# Supplementary material for: The Ordinal Effects of Ostracism: A Meta-Analysis of 120 Cyberball Studies
Source: PLoS One. 2015 May 29;10(5):e0127002. doi: 10.1371/journal.pone.0127002 (PMC4449005; doi:10.1371/journal.pone.0127002)
Supplement: S4 File — Contains the lists of what studies that were in the meta-analysis are included in computing the effects for the different panels. (XLSX) [file pone.0127002.s004.xlsx]

## Sheet: Sheet1
These are the selection lists on which the estimates in Figure 2 are based.
											Traditional ostracism T1					Moderated ostracism effect T1					Traditional ostracism effect T2					Moderated ostracism effect T2					Moderator effect within ostracism level T1					Moderator effect within inclusion level T1					Moderator effect within ostracism level T2					Moderator effect within inclusion level T2
First_author	Year	N	d T1	(SE)	d T2	(SE)	\Delta d T1	(SE)	\Delta d T2	(SE)	All	Fundamental	Intrapersonal	Interpersonal	Model	All	Fundamental	Intrapersonal	Interpersonal	Model	All	Fundamental	Intrapersonal	Interpersonal	Model	All	Fundamental	Intrapersonal	Interpersonal	Model	All	Fundamental	Intrapersonal	Interpersonal	Model	All	Fundamental	Intrapersonal	Interpersonal	Model	All	Fundamental	Intrapersonal	Interpersonal	Model	All	Fundamental	Intrapersonal	Interpersonal
Alvares	2010	74	-1.21233	0.117612	-0.100834	0.0988994	-0.149481	0.236938	1.12181	0.228206	0	0	0	0	0	0	0	0	0	0	0	0	0	0	0	0	0	0	0	0	0	0	0	0	0	0	0	0	0	0	0	0	0	0	0	0	0	0	0
Ambrosini	2013	40	-1.68612	0.131386	-0.972075	0.10766	-	-	-	-	0	0	0	0	0	0	0	0	0	0	0	0	0	0	0	0	0	0	0	0	0	0	0	0	0	0	0	0	0	0	0	0	0	0	0	0	0	0	0
Anonymous	-	49	-3.96729	0.243713	-1.32018	0.100892	-	-	-	-	1	0	0	1	0	1	0	0	1	0	1	0	1	0	1	1	0	1	0	1	1	0	0	1	0	1	0	0	1	0	1	0	1	0	1	1	0	1	0
Anonymous	-	91	-3.16838	0.19723	-0.480093	0.0882503	0.748708	0.564933	0.528181	0.181238	0	0	0	0	0	0	0	0	0	0	0	0	0	0	0	0	0	0	0	0	0	0	0	0	0	0	0	0	0	0	0	0	0	0	0	0	0	0	0
Aydin	2012	68	-0.952615	0.129678	-0.402443	0.118383	-1.19194	0.239093	0.723248	0.228619	1	0	1	0	1	1	0	1	0	1	1	1	1	0	0	1	1	1	0	0	1	0	1	0	1	1	0	1	0	1	1	1	1	0	0	1	1	1	0
Banki	2012	89	-1.8661	0.0691022	-0.350621	0.048865	-	-	-	-	0	0	0	0	0	0	0	0	0	0	0	0	0	0	0	0	0	0	0	0	0	0	0	0	0	0	0	0	0	0	0	0	0	0	0	0	0	0	0
Bastian	2010	72	-2.74703	0.106736	-1.41971	0.0683294	-	-	-	-	0	0	0	0	0	0	0	0	0	0	0	0	0	0	0	0	0	0	0	0	0	0	0	0	0	0	0	0	0	0	0	0	0	0	0	0	0	0	0
Bernstein	2012	24	-0.4073	0.157705	-	-	-	-	-	-	0	0	0	0	0	0	0	0	0	0	0	0	0	0	0	0	0	0	0	0	0	0	0	0	0	0	0	0	0	0	0	0	0	0	0	0	0	0	0
Bernstein	2012	25.5	-1.03509	0.166994	-	-	-	-	-	-	0	0	0	0	0	0	0	0	0	0	0	0	0	0	0	0	0	0	0	0	0	0	0	0	0	0	0	0	0	0	0	0	0	0	0	0	0	0	0
Bernstein	2010	73	-1.62854	0.160238	-1.62814	0.160218	-0.861681	0.374119	-1.10822	0.396004	0	0	0	0	0	0	0	0	0	0	0	0	0	0	0	0	0	0	0	0	0	0	0	0	0	0	0	0	0	0	0	0	0	0	0	0	0	0	0
Bernstein	2010	138	-2.67366	0.0987095	-1.95619	0.0768558	-0.531236	0.221285	-0.50519	0.17349	1	1	1	0	1	1	1	1	0	1	1	0	1	0	0	1	0	1	0	0	1	1	1	0	1	1	1	1	0	1	1	0	1	0	0	1	0	1	0
Bernstein	2012	67	-2.00327	0.174399	-0.990716	0.129817	-1.06998	0.448216	-0.796721	0.300009	1	1	1	0	1	1	1	1	0	1	1	1	1	0	1	1	1	1	0	1	1	1	1	0	1	1	1	1	0	1	1	1	1	0	1	1	1	1	0
Bernstein	2012	27	-1.38511	0.174069	-	-	-	-	-	-	1	1	1	0	1	1	1	1	0	1	1	1	1	0	1	1	1	1	0	1	1	1	1	0	1	1	1	1	0	1	1	1	1	0	1	1	1	1	0
Boyes	2009	89	-0.434008	0.0452157	-0.801689	0.0477682	-	-	-	-	1	0	1	0	1	1	0	1	0	1	1	0	1	0	0	1	0	1	0	0	1	0	1	0	1	1	0	1	0	1	1	0	1	0	0	1	0	1	0
Boyes	2009	87	-0.195505	0.045373	-0.839179	0.0492006	-	-	-	-	1	0	1	0	1	1	0	1	0	1	1	0	1	0	0	1	0	1	0	0	1	0	1	0	1	1	0	1	0	1	1	0	1	0	0	1	0	1	0
Brochu	-	35	-2.51222	0.199028	-0.476015	0.112105	-	-	-	-	1	0	1	0	0	1	0	1	0	0	1	1	1	0	1	1	1	1	0	1	1	0	1	0	0	1	0	1	0	0	1	1	1	0	1	1	1	1	0
Brown	2009	52	-0.640512	0.0784704	-	-	-	-	-	-	0	0	0	0	0	0	0	0	0	0	0	0	0	0	0	0	0	0	0	0	0	0	0	0	0	0	0	0	0	0	0	0	0	0	0	0	0	0	0
Carter	2008	143	-0.277561	0.0573014	0.199147	0.0570305	0.338012	0.11171	0.174391	0.111371	0	0	0	0	0	0	0	0	0	0	0	0	0	0	0	0	0	0	0	0	0	0	0	0	0	0	0	0	0	0	0	0	0	0	0	0	0	0	0
Carter-Sowell	2008	65	-2.86219	0.123045	-1.48127	0.0769066	-	-	-	-	0	0	0	0	0	0	0	0	0	0	0	0	0	0	0	0	0	0	0	0	0	0	0	0	0	0	0	0	0	0	0	0	0	0	0	0	0	0	0
Carter-Sowell	2010	74	-1.60253	0.137917	-1.48686	0.133088	-1.22569	0.326026	-1.15482	0.339048	1	0	1	0	1	1	0	1	0	1	1	1	1	0	1	1	1	1	0	1	1	0	1	0	1	1	0	1	0	1	1	1	1	0	1	1	1	1	0
Carter-Sowell	2010	70.6667	-2.09265	0.16978	-0.559537	0.112241	-0.646058	0.38721	-0.631175	0.238076	1	0	1	0	0	1	0	1	0	0	1	0	0	1	1	1	0	0	1	1	1	0	1	0	0	1	0	1	0	0	1	0	0	1	1	1	0	0	1
Chen	2012	60	-1.03637	0.143581	-	-	-1.35046	0.270016	-	-	1	0	0	1	0	1	0	0	1	0	0	0	0	0	0	0	0	0	0	0	1	0	0	1	0	1	0	0	1	0	0	0	0	0	0	0	0	0	0
Chen	2012	83	-1.31965	0.113525	-	-	-1.31827	0.206205	-	-	1	0	1	0	1	1	0	1	0	1	1	0	1	0	0	1	0	1	0	0	1	0	1	0	1	1	0	1	0	1	1	0	1	0	0	1	0	1	0
Chernyak	2010	76	-1.51857	0.0985727	0.152996	0.0761937	-	-	-	-	1	0	0	1	0	1	0	0	1	0	0	0	0	0	0	0	0	0	0	0	1	0	0	1	0	1	0	0	1	0	0	0	0	0	0	0	0	0	0
Chow	2008	75	-1.19923	0.0617963	-1.31392	0.0637178	-	-	-	-	0	0	0	0	0	0	0	0	0	0	0	0	0	0	0	0	0	0	0	0	0	0	0	0	0	0	0	0	0	0	0	0	0	0	0	0	0	0	0
Chrisp	2012	77	-0.698487	0.0551106	-0.145428	0.0520799	-	-	-	-	1	0	1	0	0	1	0	1	0	0	1	0	1	0	1	1	0	1	0	1	1	0	1	0	0	1	0	1	0	0	1	0	1	0	1	1	0	1	0
Coyne	2011	40	-0.556764	0.099723	-	-	-	-	-	-	0	0	0	0	0	0	0	0	0	0	0	0	0	0	0	0	0	0	0	0	0	0	0	0	0	0	0	0	0	0	0	0	0	0	0	0	0	0	0
De Waal-Andrews	2012	136	-3.55263	0.159544	-2.55477	0.111932	-1.2863	0.235563	-0.866709	0.184588	1	0	0	1	0	1	0	0	1	0	1	0	1	0	1	1	0	1	0	1	1	0	0	1	0	1	0	0	1	0	1	0	1	0	1	1	0	1	0
De Waal-Andrews	2012	112	-4.20666	0.216395	-2.17482	0.106513	-1.55516	0.308103	-1.19697	0.184074	0	0	0	0	0	0	0	0	0	0	0	0	0	0	0	0	0	0	0	0	0	0	0	0	0	0	0	0	0	0	0	0	0	0	0	0	0	0	0
DeBono	-	57	-1.06529	0.151713	-0.0468955	0.131842	-1.55199	0.285306	-0.482077	0.267638	0	0	0	0	0	0	0	0	0	0	0	0	0	0	0	0	0	0	0	0	0	0	0	0	0	0	0	0	0	0	0	0	0	0	0	0	0	0	0
DeBono	-	81	-1.0741	0.108964	-0.103931	0.0948542	-0.32837	0.208915	0.242955	0.189801	0	0	0	0	0	0	0	0	0	0	0	0	0	0	0	0	0	0	0	0	0	0	0	0	0	0	0	0	0	0	0	0	0	0	0	0	0	0	0
DeBono	-	83	-0.134919	0.0927626	-	-	-0.74796	0.189017	-	-	0	0	0	0	0	0	0	0	0	0	0	0	0	0	0	0	0	0	0	0	0	0	0	0	0	0	0	0	0	0	0	0	0	0	0	0	0	0	0
Dietrich	2010	75	1.42616	0.0657773	-	-	-	-	-	-	0	0	0	0	0	0	0	0	0	0	0	0	0	0	0	0	0	0	0	0	0	0	0	0	0	0	0	0	0	0	0	0	0	0	0	0	0	0	0
Duclos	2012	59	-0.633745	0.0693556	-	-	-	-	-	-	0	0	0	0	0	0	0	0	0	0	0	0	0	0	0	0	0	0	0	0	0	0	0	0	0	0	0	0	0	0	0	0	0	0	0	0	0	0	0
Eisenberger	2006	48	-0.15242	0.0807427	-1.23956	0.0965061	-	-	-	-	1	0	0	1	0	1	0	0	1	0	0	0	0	0	0	0	0	0	0	0	1	0	0	1	0	1	0	0	1	0	0	0	0	0	0	0	0	0	0
Fayant	-	60	-2.03702	0.195398	-1.11959	0.147132	0.215813	0.382744	-0.438621	0.27528	1	0	0	1	0	1	0	0	1	0	0	0	0	0	0	0	0	0	0	0	1	0	0	1	0	1	0	0	1	0	0	0	0	0	0	0	0	0	0
Floor	2007	88	-1.92137	0.128789	-0.731883	0.0937225	-0.207675	0.27571	-0.585635	0.185628	0	0	0	0	0	0	0	0	0	0	0	0	0	0	0	0	0	0	0	0	0	0	0	0	0	0	0	0	0	0	0	0	0	0	0	0	0	0	0
Gallardo-Pujol	2012	57	-1.17612	0.164444	-0.520355	0.145902	-1.17276	0.309086	0.105954	0.291723	0	0	0	0	0	0	0	0	0	0	0	0	0	0	0	0	0	0	0	0	0	0	0	0	0	0	0	0	0	0	0	0	0	0	0	0	0	0	0
Gan	2012	72	-0.535893	0.0279025	-0.0687928	0.0269418	-0.61545	0.0622165	0.0191534	0.0612861	0	0	0	0	0	0	0	0	0	0	0	0	0	0	0	0	0	0	0	0	0	0	0	0	0	0	0	0	0	0	0	0	0	0	0	0	0	0	0
Garczynski	2013	83	-1.5104	0.18729	0.389607	0.146338	-1.29223	0.328125	-0.00779752	0.289837	0	0	0	0	0	0	0	0	0	0	0	0	0	0	0	0	0	0	0	0	0	0	0	0	0	0	0	0	0	0	0	0	0	0	0	0	0	0	0
Geniole	2011	74	0.194554	0.0623224	-0.113576	0.0621244	-	-	-	-	0	0	0	0	0	0	0	0	0	0	0	0	0	0	0	0	0	0	0	0	0	0	0	0	0	0	0	0	0	0	0	0	0	0	0	0	0	0	0
Gerber	-	38	-2.09436	0.158352	-	-	-	-	-	-	0	0	0	0	0	0	0	0	0	0	0	0	0	0	0	0	0	0	0	0	0	0	0	0	0	0	0	0	0	0	0	0	0	0	0	0	0	0	0
Gerber	-	89	-3.37884	0.214845	-	-	-	-	-	-	0	0	0	0	0	0	0	0	0	0	0	0	0	0	0	0	0	0	0	0	0	0	0	0	0	0	0	0	0	0	0	0	0	0	0	0	0	0	0
Gonsalkorale	2007	97	-1.30958	0.141061	0.258981	0.116092	0.485653	0.30281	1.31499	0.248977	0	0	0	0	0	0	0	0	0	0	0	0	0	0	0	0	0	0	0	0	0	0	0	0	0	0	0	0	0	0	0	0	0	0	0	0	0	0	0
Goodwin	2010	300	-1.81183	0.0423814	-0.944207	0.0339616	0.204568	0.0849566	-0.425306	0.0651038	0	0	0	0	0	0	0	0	0	0	0	0	0	0	0	0	0	0	0	0	0	0	0	0	0	0	0	0	0	0	0	0	0	0	0	0	0	0	0
Goodwin	2010	314	0.131722	0.0192269	-0.089765	0.0192045	0.350152	0.0562725	-0.100282	0.0560751	1	0	1	0	0	1	0	1	0	0	1	1	1	0	1	1	1	1	0	1	1	0	1	0	0	1	0	1	0	0	1	1	1	0	1	1	1	1	0
Greitemeyer	2012	56	-0.480212	0.0714321	-0.234285	0.0698633	-	-	-	-	1	1	1	0	0	1	1	1	0	0	1	0	1	0	1	1	0	1	0	1	1	1	1	0	0	1	1	1	0	0	1	0	1	0	1	1	0	1	0
Gruijters	-	113	-0.25867	0.0579893	-1.06934	0.0659053	-	-	-	-	0	0	0	0	0	0	0	0	0	0	0	0	0	0	0	0	0	0	0	0	0	0	0	0	0	0	0	0	0	0	0	0	0	0	0	0	0	0	0
Hackenbracht	2013	51	-1.92219	0.112188	-0.177239	0.0762722	-	-	-	-	1	0	0	1	0	1	0	0	1	0	1	0	1	0	1	1	0	1	0	1	1	0	0	1	0	1	0	0	1	0	1	0	1	0	1	1	0	1	0
Hawes	2012	55	-2.15733	0.23292	0.686867	0.152492	0.00193652	0.383576	-1.04975	0.283886	1	0	0	1	0	1	0	0	1	0	1	0	1	0	1	1	0	1	0	1	1	0	0	1	0	1	0	0	1	0	1	0	1	0	1	1	0	1	0
Hellmann	-	76	-1.21138	0.119945	0.185231	0.101088	-1.40423	0.222124	0.739366	0.206567	1	0	0	1	0	1	0	0	1	0	0	0	0	0	0	0	0	0	0	0	1	0	0	1	0	1	0	0	1	0	0	0	0	0	0	0	0	0	0
Hess	2010	162	-2.34194	0.0413852	-0.86552	0.0267692	-	-	-	-	0	0	0	0	0	0	0	0	0	0	0	0	0	0	0	0	0	0	0	0	0	0	0	0	0	0	0	0	0	0	0	0	0	0	0	0	0	0	0
Hess	2011	38	-0.635045	0.106223	-	-	-	-	-	-	0	0	0	0	0	0	0	0	0	0	0	0	0	0	0	0	0	0	0	0	0	0	0	0	0	0	0	0	0	0	0	0	0	0	0	0	0	0	0
Horn	-	68	-0.76655	0.123979	-0.994192	0.130052	-0.98514	0.233272	1.4921	0.242868	0	0	0	0	0	0	0	0	0	0	0	0	0	0	0	0	0	0	0	0	0	0	0	0	0	0	0	0	0	0	0	0	0	0	0	0	0	0	0
Ijzerman	2012	86	-1.67236	0.119292	-	-	-1.07225	0.217233	-	-	0	0	0	0	0	0	0	0	0	0	0	0	0	0	0	0	0	0	0	0	0	0	0	0	0	0	0	0	0	0	0	0	0	0	0	0	0	0	0
Jamieson	2010	33	-1.55542	0.151627	-1.0617	0.132049	-	-	-	-	1	0	1	0	1	1	0	1	0	1	1	1	1	0	0	1	1	1	0	0	1	0	1	0	1	1	0	1	0	1	1	1	1	0	0	1	1	1	0
Jamieson	2010	68	-1.9428	0.0852009	-1.46671	0.0732654	-	-	-	-	1	1	1	0	1	1	1	1	0	1	1	0	1	0	0	1	0	1	0	0	1	1	1	0	1	1	1	1	0	1	1	0	1	0	0	1	0	1	0
Johnson	2010	104	-0.732976	0.0408218	-0.785733	0.041207	-	-	-	-	1	1	1	0	1	1	1	1	0	1	1	0	1	0	0	1	0	1	0	0	1	1	1	0	1	1	1	1	0	1	1	0	1	0	0	1	0	1	0
Kassner	-	85	-1.71729	0.12964	-1.01805	0.106315	-0.873836	0.314721	-0.304453	0.213634	1	1	1	0	1	1	1	1	0	1	1	0	1	0	1	1	0	1	0	1	1	1	1	0	1	1	1	1	0	1	1	0	1	0	1	1	0	1	0
Kassner	2012	49	-2.11214	0.124441	-1.77778	0.111169	-	-	-	-	0	0	0	0	0	0	0	0	0	0	0	0	0	0	0	0	0	0	0	0	0	0	0	0	0	0	0	0	0	0	0	0	0	0	0	0	0	0	0
Kerr	2008	250	-1.66109	0.021425	-0.0525492	0.0159121	-	-	-	-	1	1	1	0	1	1	1	1	0	1	1	0	1	0	0	1	0	1	0	0	1	1	1	0	1	1	1	1	0	1	1	0	1	0	0	1	0	1	0
Kesting	2013	76	-0.278876	0.0521918	-0.789736	0.0557834	-	-	-	-	1	1	1	0	1	1	1	1	0	1	1	0	1	0	0	1	0	1	0	0	1	1	1	0	1	1	1	1	0	1	1	0	1	0	0	1	0	1	0
Knowles	2010	62	-0.380117	0.121056	-	-	-0.990208	0.253302	-	-	1	0	1	0	0	1	0	1	0	0	0	0	0	0	0	0	0	0	0	0	1	0	1	0	0	1	0	1	0	0	0	0	0	0	0	0	0	0	0
Knowles	2012	60	-0.601984	0.0679049	-	-	-	-	-	-	1	0	1	0	1	1	0	1	0	1	1	1	0	1	1	1	1	0	1	1	1	0	1	0	1	1	0	1	0	1	1	1	0	1	1	1	1	0	1
Krijnen	2008	144	-4.73655	0.105401	-0.175071	0.0276081	-	-	-	-	1	1	1	0	1	1	1	1	0	1	1	0	1	0	0	1	0	1	0	0	1	1	1	0	1	1	1	1	0	1	1	0	1	0	0	1	0	1	0
Krill	2008	119	-2.10674	0.051824	-0.566937	0.034526	-	-	-	-	1	1	1	0	1	1	1	1	0	1	1	0	0	1	1	1	0	0	1	1	1	1	1	0	1	1	1	1	0	1	1	0	0	1	1	1	0	0	1
Lakin	2008	36	-1.5269	0.138305	-0.505124	0.109468	-	-	-	-	1	1	1	0	1	1	1	1	0	1	1	0	1	0	0	1	0	1	0	0	1	1	1	0	1	1	1	1	0	1	1	0	1	0	0	1	0	1	0
Lau	2009	56	-2.50383	0.23244	-1.08896	0.147718	-0.0586305	0.578655	1.36492	0.456813	1	1	1	0	1	1	1	1	0	1	1	0	0	1	1	1	0	0	1	1	1	1	1	0	1	1	1	1	0	1	1	0	0	1	1	1	0	0	1
Lustenberger	2010	71	-0.82619	0.0599846	0.0423396	0.0551903	-	-	-	-	1	1	1	0	1	1	1	1	0	1	1	1	1	0	0	1	1	1	0	0	1	1	1	0	1	1	1	1	0	1	1	1	1	0	0	1	1	1	0
Lustenberger	2010	156	-0.701577	0.0269658	-	-	-	-	-	-	1	1	1	0	1	1	1	1	0	1	1	0	0	1	1	1	0	0	1	1	1	1	1	0	1	1	1	1	0	1	1	0	0	1	1	1	0	0	1
MacDonald	2008	63	-0.148612	0.0621973	-	-	-	-	-	-	0	0	0	0	0	0	0	0	0	0	0	0	0	0	0	0	0	0	0	0	0	0	0	0	0	0	0	0	0	0	0	0	0	0	0	0	0	0	0
McDonald	2012	270	-0.0594103	0.0166729	-2.40465	0.0273744	-	-	-	-	1	1	1	0	1	1	1	1	0	1	1	0	1	0	1	1	0	1	0	1	1	1	1	0	1	1	1	1	0	1	1	0	1	0	1	1	0	1	0
Nordgren	2011	71	-0.744392	0.0589814	-	-	-	-	-	-	0	0	0	0	0	0	0	0	0	0	0	0	0	0	0	0	0	0	0	0	0	0	0	0	0	0	0	0	0	0	0	0	0	0	0	0	0	0	0
Nordgren	2011	74	-0.800923	0.0572322	-	-	-	-	-	-	0	0	0	0	0	0	0	0	0	0	0	0	0	0	0	0	0	0	0	0	0	0	0	0	0	0	0	0	0	0	0	0	0	0	0	0	0	0	0
Nordgren	2011	46	-2.23828	0.138316	-	-	-	-	-	-	0	0	0	0	0	0	0	0	0	0	0	0	0	0	0	0	0	0	0	0	0	0	0	0	0	0	0	0	0	0	0	0	0	0	0	0	0	0	0
Nordgren	2011	44.6667	-0.554643	0.0897031	-0.753119	0.0926086	-	-	-	-	0	0	0	0	0	0	0	0	0	0	0	0	0	0	0	0	0	0	0	0	0	0	0	0	0	0	0	0	0	0	0	0	0	0	0	0	0	0	0
Nordgren	2011	58.6667	-0.647696	0.0698907	-	-	-	-	-	-	1	1	1	0	1	1	1	1	0	1	1	1	1	0	0	1	1	1	0	0	1	1	1	0	1	1	1	1	0	1	1	1	1	0	0	1	1	1	0
Oberleitner	2012	88	-2.36242	0.0763545	0.42036	0.0456481	-	-	-	-	1	1	1	0	1	1	1	1	0	1	1	1	0	0	0	1	1	0	0	0	1	1	1	0	1	1	1	1	0	1	1	1	0	0	0	1	1	0	0
OBrien	2012	125	-0.579211	0.0329457	-0.690848	0.0335128	-	-	-	-	1	1	1	0	1	1	1	1	0	1	1	0	1	0	1	1	0	1	0	1	1	1	1	0	1	1	1	1	0	1	1	0	1	0	1	1	0	1	0
Peterson	2011	40	-0.891273	0.105778	-0.908933	0.106175	-	-	-	-	1	1	1	0	1	1	1	1	0	1	1	0	1	0	0	1	0	1	0	0	1	1	1	0	1	1	1	1	0	1	1	0	1	0	0	1	0	1	0
Pharo	2011	74	-1.3304	0.130834	-0.583611	0.110982	-1.00757	0.298226	-0.837705	0.233747	1	1	1	0	1	1	1	1	0	1	1	0	1	0	0	1	0	1	0	0	1	1	1	0	1	1	1	1	0	1	1	0	1	0	0	1	0	1	0
Plaisier	2012	149	-0.360415	0.0535334	0.234969	0.0530354	-0.402421	0.108284	-0.564467	0.10678	0	0	0	0	0	0	0	0	0	0	0	0	0	0	0	0	0	0	0	0	0	0	0	0	0	0	0	0	0	0	0	0	0	0	0	0	0	0	0
Ramirez	2009	121	-2.26387	0.0538125	-1.01857	0.0369216	-	-	-	-	0	0	0	0	0	0	0	0	0	0	0	0	0	0	0	0	0	0	0	0	0	0	0	0	0	0	0	0	0	0	0	0	0	0	0	0	0	0	0
Ren	2012	53	-2.17785	0.117939	-0.174763	0.0734815	-	-	-	-	0	0	0	0	0	0	0	0	0	0	0	0	0	0	0	0	0	0	0	0	0	0	0	0	0	0	0	0	0	0	0	0	0	0	0	0	0	0	0
Renneberg	2011	60	-1.45525	0.160975	-1.30214	0.153939	0.468684	0.294851	0.51229	0.286086	1	1	1	0	1	1	1	1	0	1	1	1	1	0	1	1	1	1	0	1	1	1	1	0	1	1	1	1	0	1	1	1	1	0	1	1	1	1	0
Riva	2011	100	-2.10103	0.126623	-1.08787	0.0929684	-	-	-	-	0	0	0	0	0	0	0	0	0	0	0	0	0	0	0	0	0	0	0	0	0	0	0	0	0	0	0	0	0	0	0	0	0	0	0	0	0	0	0
Ruggieri	-	91	-0.385515	0.0440629	-0.565359	0.0450025	-	-	-	-	0	0	0	0	0	0	0	0	0	0	0	0	0	0	0	0	0	0	0	0	0	0	0	0	0	0	0	0	0	0	0	0	0	0	0	0	0	0	0
Ruggieri	-	74	-0.0603762	0.129397	-0.226875	0.130122	-0.314998	0.241228	-0.678026	0.227484	0	0	0	0	0	0	0	0	0	0	0	0	0	0	0	0	0	0	0	0	0	0	0	0	0	0	0	0	0	0	0	0	0	0	0	0	0	0	0
Sacco	2011	51	-2.39705	0.132267	-1.44673	0.0964549	-	-	-	-	0	0	0	0	0	0	0	0	0	0	0	0	0	0	0	0	0	0	0	0	0	0	0	0	0	0	0	0	0	0	0	0	0	0	0	0	0	0	0
Sacco	2011	21	-2.28382	0.28671	-1.46404	0.216882	-	-	-	-	0	0	0	0	0	0	0	0	0	0	0	0	0	0	0	0	0	0	0	0	0	0	0	0	0	0	0	0	0	0	0	0	0	0	0	0	0	0	0
Sacco	2011	38	-1.73629	0.136899	-1.03537	0.111993	-	-	-	-	0	0	0	0	0	0	0	0	0	0	0	0	0	0	0	0	0	0	0	0	0	0	0	0	0	0	0	0	0	0	0	0	0	0	0	0	0	0	0
Salvy	2010	59	-1.45148	0.0838249	-1.43452	0.0834102	-	-	-	-	0	0	0	0	0	0	0	0	0	0	0	0	0	0	0	0	0	0	0	0	0	0	0	0	0	0	0	0	0	0	0	0	0	0	0	0	0	0	0
Salvy	2009	103	-1.47694	0.04884	-1.31378	0.0466296	-	-	-	-	1	1	1	0	1	1	1	1	0	1	1	0	0	1	1	1	0	0	1	1	1	1	1	0	1	1	1	1	0	1	1	0	0	1	1	1	0	0	1
Schaafsma	2012	720	-1.41514	0.0193166	-0.492928	0.0159064	0.0863968	0.0295208	0.328716	0.0253186	0	0	0	0	0	0	0	0	0	0	0	0	0	0	0	0	0	0	0	0	0	0	0	0	0	0	0	0	0	0	0	0	0	0	0	0	0	0	0
Segovia	2012	56	0.135042	0.134303	-	-	-1.8868	0.320537	-	-	0	0	0	0	0	0	0	0	0	0	0	0	0	0	0	0	0	0	0	0	0	0	0	0	0	0	0	0	0	0	0	0	0	0	0	0	0	0	0
Staebler	2011	68	-0.793804	0.124624	-0.0545526	0.115121	0.503717	0.233507	0.415389	0.22729	1	1	1	0	1	1	1	1	0	1	1	0	1	0	0	1	0	1	0	0	1	1	1	0	1	1	1	1	0	1	1	0	1	0	0	1	0	1	0
Stillman	2009	121	-0.740683	0.150432	-1.1269	0.16379	0.573056	0.223755	-1.18594	0.237021	0	0	0	0	0	0	0	0	0	0	0	0	0	0	0	0	0	0	0	0	0	0	0	0	0	0	0	0	0	0	0	0	0	0	0	0	0	0	0
Stock	2011	155	-1.99645	0.0384343	-0.133476	0.0256344	-	-	-	-	0	0	0	0	0	0	0	0	0	0	0	0	0	0	0	0	0	0	0	0	0	0	0	0	0	0	0	0	0	0	0	0	0	0	0	0	0	0	0
Van Beest	2011	87	-0.935578	0.0985344	-0.582445	0.0923728	-0.399712	0.241234	-0.437816	0.189088	0	0	0	0	0	0	0	0	0	0	0	0	0	0	0	0	0	0	0	0	0	0	0	0	0	0	0	0	0	0	0	0	0	0	0	0	0	0	0
Van Beest	2011	183	-2.63723	0.130247	-0.499592	0.0714277	-0.757978	0.222701	-0.112265	0.134393	1	1	1	0	1	1	1	1	0	1	1	1	1	0	0	1	1	1	0	0	1	1	1	0	1	1	1	1	0	1	1	1	1	0	0	1	1	1	0
Van Beest	2006	135	-1.28917	0.070173	-0.654443	0.0610348	-0.0972146	0.137514	-0.125266	0.120904	0	0	0	0	0	0	0	0	0	0	0	0	0	0	0	0	0	0	0	0	0	0	0	0	0	0	0	0	0	0	0	0	0	0	0	0	0	0	0
Van Beest	2006	111.333	-2.1115	0.109821	0.0935519	0.0698539	-0.0857344	0.221453	-0.1894	0.13971	0	0	0	0	0	0	0	0	0	0	0	0	0	0	0	0	0	0	0	0	0	0	0	0	0	0	0	0	0	0	0	0	0	0	0	0	0	0	0
Van Beest	2012	125	-2.68328	0.10881	-1.2424	0.067821	0.0643313	0.354387	-0.225256	0.152399	0	0	0	0	0	0	0	0	0	0	0	0	0	0	0	0	0	0	0	0	0	0	0	0	0	0	0	0	0	0	0	0	0	0	0	0	0	0	0
Van Beest	2012	85	-3.09952	0.201167	0.0466915	0.0894826	-0.278998	0.435614	0.0737609	0.18098	0	0	0	0	0	0	0	0	0	0	0	0	0	0	0	0	0	0	0	0	0	0	0	0	0	0	0	0	0	0	0	0	0	0	0	0	0	0	0
Van Dijk	-	51	-1.49958	0.0980108	-0.0425991	0.075982	-	-	-	-	0	0	0	0	0	0	0	0	0	0	0	0	0	0	0	0	0	0	0	0	0	0	0	0	0	0	0	0	0	0	0	0	0	0	0	0	0	0	0
Webb	-	170	-0.909078	0.0506903	-0.378415	0.046718	0.0250554	0.102531	0.0425676	0.0949119	0	0	0	0	0	0	0	0	0	0	0	0	0	0	0	0	0	0	0	0	0	0	0	0	0	0	0	0	0	0	0	0	0	0	0	0	0	0	0
Weik	2010	65	0.156394	0.118717	-0.224919	0.119125	-0.426355	0.235264	0.661714	0.239045	1	1	1	0	1	1	1	1	0	1	1	1	1	0	0	1	1	1	0	0	1	1	1	0	1	1	1	1	0	1	1	1	1	0	0	1	1	1	0
Wesselmann	2009	82	-0.712413	0.0998089	-2.03001	0.143875	-1.29962	0.244922	-0.19821	0.284123	1	1	1	0	1	1	1	1	0	1	1	1	1	0	0	1	1	1	0	0	1	1	1	0	1	1	1	1	0	1	1	1	1	0	0	1	1	1	0
Wesselmann	2012	91	-1.45593	0.0552728	-	-	-	-	-	-	0	0	0	0	0	0	0	0	0	0	0	0	0	0	0	0	0	0	0	0	0	0	0	0	0	0	0	0	0	0	0	0	0	0	0		0	0	0
Williams	2002	390	-0.390412	0.010412	-2.34949	0.0172936	-	-	-	-	1	1	1	0	1	1	1	1	0	1	1	0	1	0	0	1	0	1	0	0	1	1	1	0	1	1	1	1	0	1	1	0	1	0	0	1	0	1	0
Williams	2000	732	-0.78856	0.00591737	-1.43629	0.00690173	-	-	-	-	0	0	0	0	0	0	0	0	0	0	0	0	0	0	0	0	0	0	0	0	0	0	0	0	0	0	0	0	0	0	0	0	0	0	0	0	0	0	0
Williams	2000	111	-0.262498	0.0614791	-1.00612	0.0688493	-0.204529	0.14652	-0.984427	0.151948	0	0	0	0	0	0	0	0	0	0	0	0	0	0	0	0	0	0	0	0	0	0	0	0	0	0	0	0	0	0	0	0	0	0	0	0	0	0	0
Wirth	2009	159.333	-2.28691	0.0820396	-0.757168	0.0528137	0.0501307	0.173183	0.460053	0.11207	1	0	0	1	0	1	0	0	1	0	1	1	1	0	1	1	1	1	0	1	1	0	0	1	0	1	0	0	1	0	1	1	1	0	1	1	1	1	0
Wirth	2010	76	-0.961205	0.0579386	-1.64344	0.0696292	-	-	-	-	0	0	0	0	0	0	0	0	0	0	0	0	0	0	0	0	0	0	0	0	0	0	0	0	0	0	0	0	0	0	0	0	0	0	0	0	0	0	0
Zadro	2004	62	-1.62684	0.156029	-0.187817	0.116463	-0.105099	0.322563	-1.11847	0.277253	0	0	0	0	0	0	0	0	0	0	0	0	0	0	0	0	0	0	0	0	0	0	0	0	0	0	0	0	0	0	0	0	0	0	0	0	0	0	0
Zadro	2004	77	-1.74812	0.141126	-0.333645	0.102381	-0.287678	0.275744	-0.697519	0.212918	0	0	0	0	0	0	0	0	0	0	0	0	0	0	0	0	0	0	0	0	0	0	0	0	0	0	0	0	0	0	0	0	0	0	0	0	0	0	0
Zadro	2006	56	-3.70258	0.191776	-0.874295	0.0761981	-	-	-	-	1	1	1	0	1	1	1	1	0	1	1	1	1	0	0	1	1	1	0	0	1	1	1	0	1	1	1	1	0	1	1	1	1	0	0	1	1	1	0
Zhong	2008	52	-0.715172	0.153255	-	-	-	-	-	-	0	0	0	0	0	0	0	0	0	0	0	0	0	0	0	0	0	0	0	0	0	0	0	0	0	0	0	0	0	0	0	0	0	0	0	0	0	0	0
Zoller	2010	57	-0.241155	0.0692331	-0.0858147	0.0687875	-	-	-	-	1	1	1	0	1	1	1	1	0	1	1	0	1	0	1	1	0	1	0	1	1	1	1	0	1	1	1	1	0	1	1	0	1	0	1	1	0	1	0
Zwolinski	2012	56	-2.0078	0.105366	-0.284858	0.0700977	-	-	-	-	0	0	0	0	0	0	0	0	0	0	0	0	0	0	0	0	0	0	0	0	0	0	0	0	0	0	0	0	0	0	0	0	0	0	0	0	0	0	0
											52	30	42	10	36	52	30	42	10	36	46	17	39	6	23	46	17	39	6	23	52	30	42	10	36	52	30	42	10	36	46	17	39	6	23	46	17	39	6
[truncated: 1 more columns]
